# Supplementary material for: Dynamic contrast-enhanced MRI detects acute radiotherapy-induced alterations in mandibular microvasculature: prospective assessment of imaging biomarkers of normal tissue injury
Source: PubMed Central journal article supplement (PMC4976364; doi:10.1038/srep29864), 2016-08-08
Supplement: srep29864-s1.pdf [file srep29864-s1.pdf]

## Supplementary Figures

### **Dynamic contrast-enhanced MRI detects acute radiotherapy-induced alterations in mandibular microvasculature: prospective assessment of imaging biomarkers of normal tissue injury**

Joint Head and Neck Radiotherapy-MRI Development Cooperative.

#### Contributing authors:

Vlad C. Sandulache<sup>1</sup>, Brian P. Hobbs<sup>2</sup>, Abdallah S.R. Mohamed<sup>3</sup>, Steven J. Frank<sup>3</sup>, Juhee Song<sup>2</sup>, Yao Ding<sup>4</sup>, Rachel Ger<sup>X</sup>, Laurence E. Court<sup>X</sup>, Jayashree Kalpathy-Cramer<sup>5</sup>, John D. Hazle<sup>4</sup>, Jihong Wang<sup>4</sup>, Musaddiq J. Awan<sup>6</sup>, David I. Rosenthal<sup>3</sup>, Adam S. Garden<sup>3</sup>, G. Brandon Gunn<sup>3</sup>, Rivka R. Colen<sup>7</sup>, Nabil El-shafeey<sup>7</sup>, Mohamed Elbanan<sup>7</sup>, Katherine A. Hutcheson<sup>1</sup>, Jan Lewin<sup>1</sup>, Mark S. Chambers<sup>1</sup>, Theresa M. Hofstede<sup>1</sup>, Randal S. Weber<sup>1</sup>, Stephen Y. Lai<sup>1,8\*</sup>, Clifton D. Fuller<sup>3\*</sup>

1- Department of Head and Neck Surgery, UT MD Anderson Cancer Center, Houston, TX; 2- Department of Biostatistics, UT MD Anderson Cancer Center, Houston, TX; 3- Department of Radiation Oncology, UT MD Anderson Cancer Center, Houston, TX; 4- Department of Imaging Physics, UT MD Anderson Cancer Center, Houston, TX; X- Department of Radiation Physics, UT MD Anderson Cancer Center; 5- Athinoula A. Martinos Center for Biomedical Imaging, Massachusetts General Hospital/ Division of Health Sciences & Technology, Massachusetts Institute of Technology, Charlestown, MA; 6- Department of Radiation Oncology, Case Western Reserve University, Cleveland, OH; 7- Department of Diagnostic Radiology, UT MD Anderson Cancer Center, Houston, TX; 8- Department of Molecular and Cellular Oncology, UT MD Anderson Cancer Center, Houston, TX

\*Co-corresponding authors.

#### **Corresponding authors:**

Stephen Y. Lai MD, PhD  
The University of Texas MD Anderson Cancer Center  
1515 Holcombe Blvd.  
Unit Number: 1445  
Houston, TX 77030  
Phone: (713) 792-6528  
Fax: (713) 794-4662  
E-mail: [sylai@mdanderson.org](mailto:sylai@mdanderson.org)

Clifton D. Fuller MD, PhD  
The University of Texas MD Anderson Cancer Center  
1515 Holcombe Blvd.  
Unit Number: 0097  
Houston, TX 77030  
Phone: (713) 792-3471  
Fax: (713) 563-2366  
E-mail: [CDFuller@mdanderson.org](mailto:CDFuller@mdanderson.org)

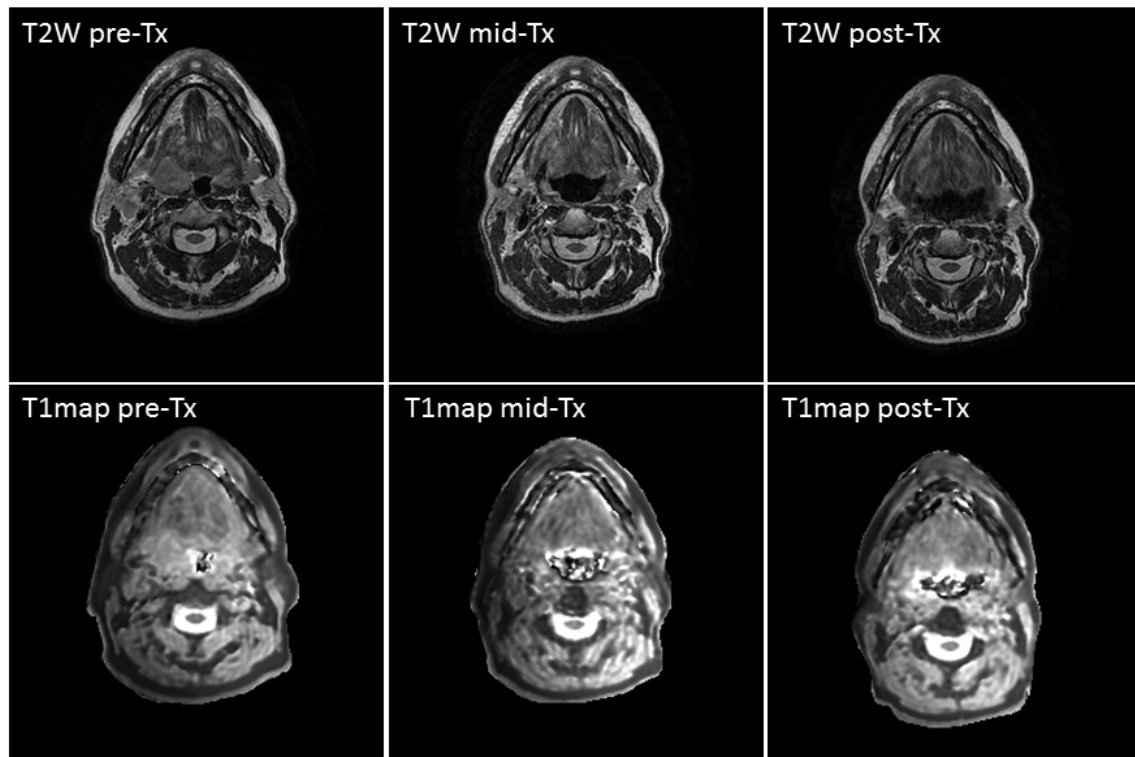

**Supplementary Figure 1. Example of pre-, mid, and post-treatment T1 map for a patient with T4, N2b, M0 tonsil squamous cell carcinoma.** The upper panel shows the T2 images and the lower panel shows the T1 maps.

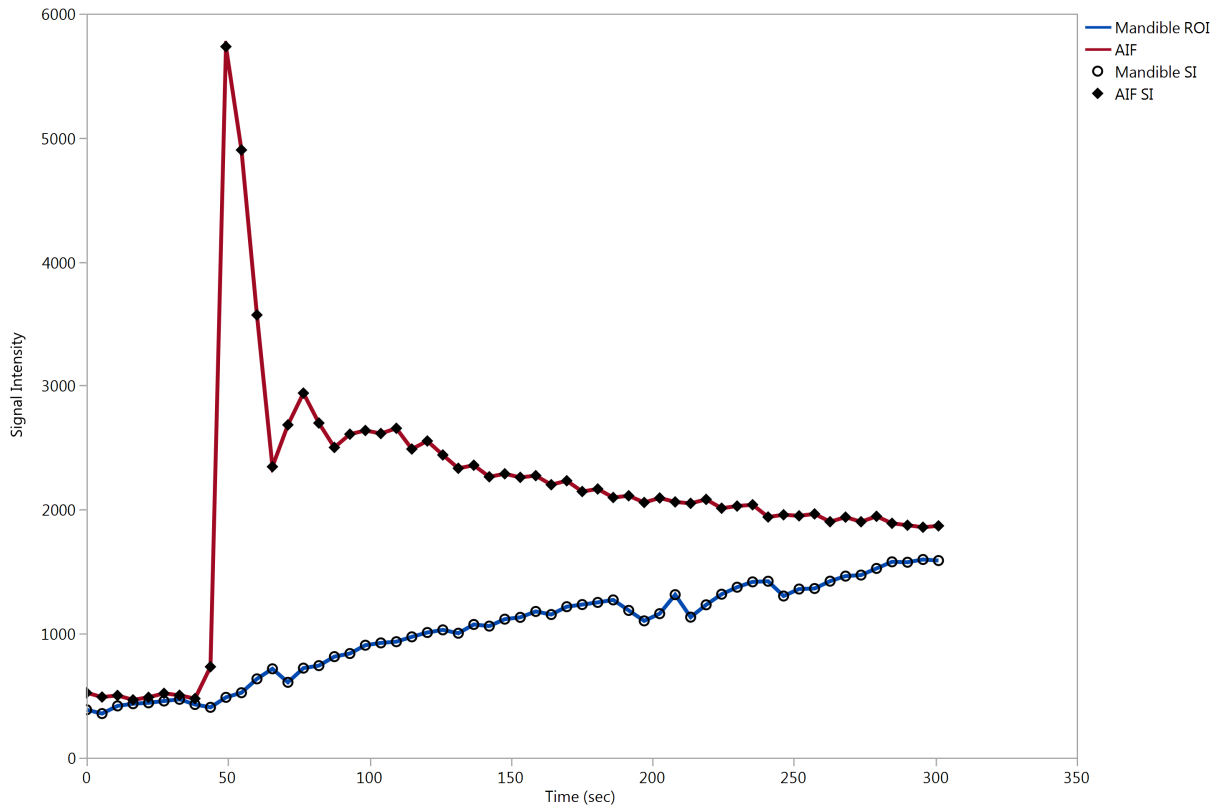

**Supplementary Figure 2. Example of a mandibular region of interest signal intensity changes against time compared to the utilized standard arterial input function (AIF).**
